# Supplementary material
Source: PubMed Central journal article supplement (PMC4473217)
Supplement: JCM.00157-15_zjm999094314so1.pdf [file JCM.00157-15_zjm999094314so1.pdf]

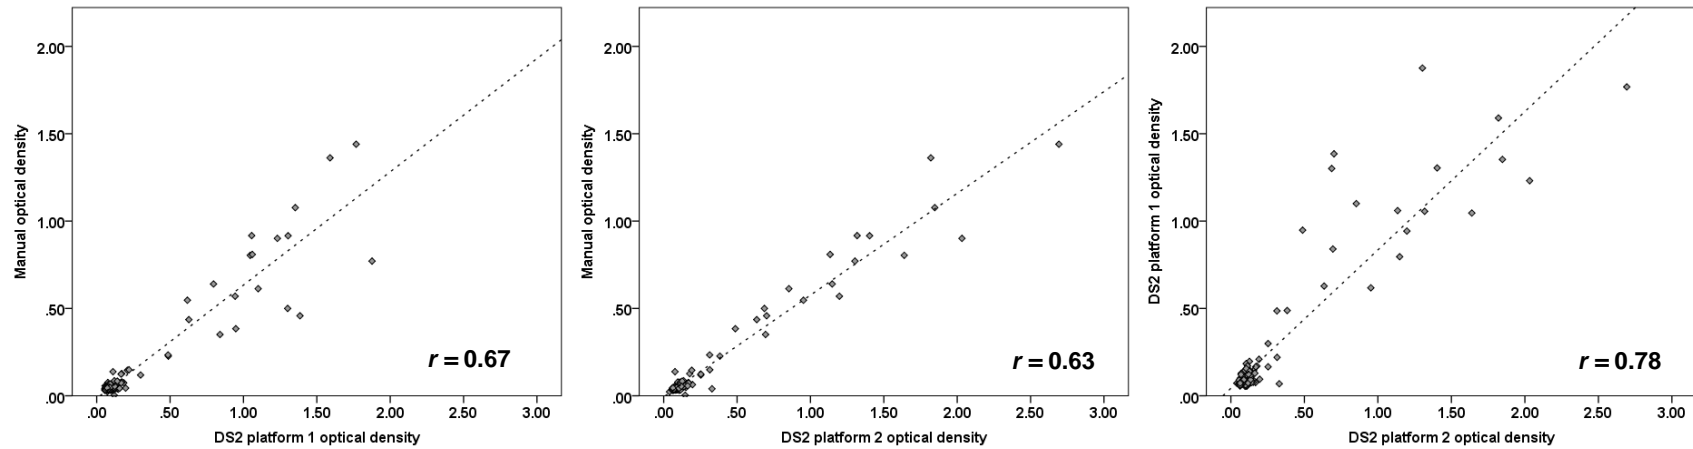

Figure S1. Linear regression and Spearman's correlation co-efficient for optical density values measured manually and on two DS2 platforms in stage (i) validating the DS2 methods using experimental samples.
